# Supplementary material for: Facile preparation of a cellulose derived carbon/BN composite aerogel for superior electromagnetic wave absorption
Source: Royal Society of Chemistry journal article supplement (doi:10.1039/d2tc00205a), 2022-01-01
Supplement: d2tc00205a1.pdf [file d2tc00205a1.pdf]

## Supporting Information

### Facile Preparation of Cellulose Derived Carbon/BN Composite Aerogel for Superior Electromagnetic Wave Absorption

Dedong Wang, Minyue Zhang, Yan Guo, Tiantian Bai, Hu Liu,<sup>1\*</sup> Chuntai Liu, Changyu Shen

Key Laboratory of Materials Processing and Mold (Zhengzhou University), Ministry of Education; National Engineering Research Center for Advanced Polymer Processing Technology, Zhengzhou University, Zhengzhou, Henan 450002, China

*\*: Correspondence authors*

E-mail addresses: [liuhu@zzu.edu.cn](mailto:liuhu@zzu.edu.cn) (H. L.)

Table S1. Formulations of CCA/BN.

| Sample       | Cellulose (%) | BNNS (%) | Pyrolysis temperature (°C) |
|--------------|---------------|----------|----------------------------|
| CCA/BN5-680  | 100           | 5        | 680                        |
| CCA/BN10-680 | 100           | 10       | 680                        |
| CCA/BN15-680 | 100           | 15       | 680                        |
| CCA/BN10-640 | 100           | 10       | 640                        |
| CCA/BN10-660 | 100           | 10       | 660                        |
| CCA/BN10-700 | 100           | 10       | 700                        |

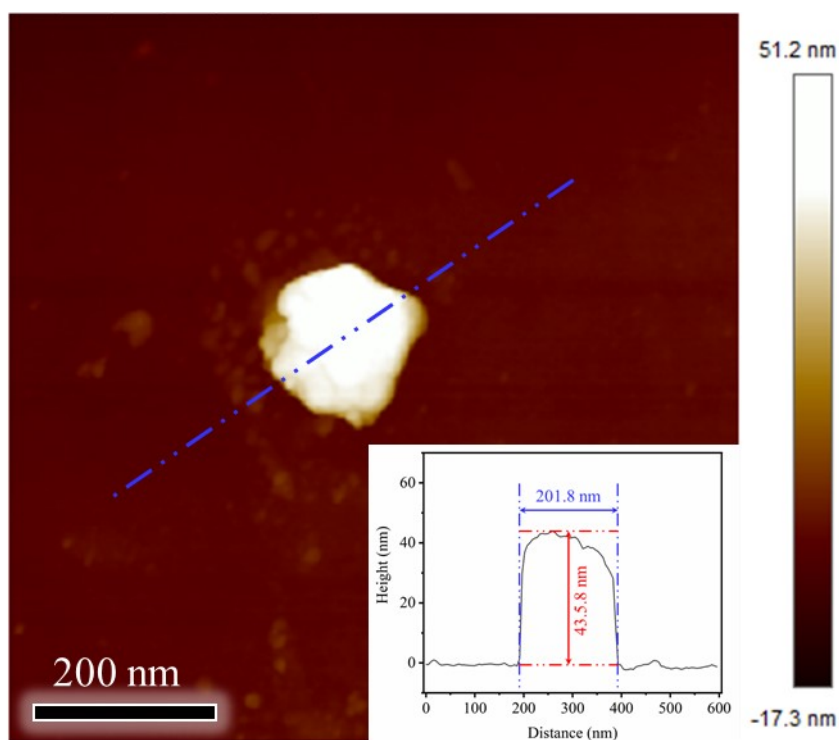

Fig. S1 AFM image of original BN, the inset shows the height profile.

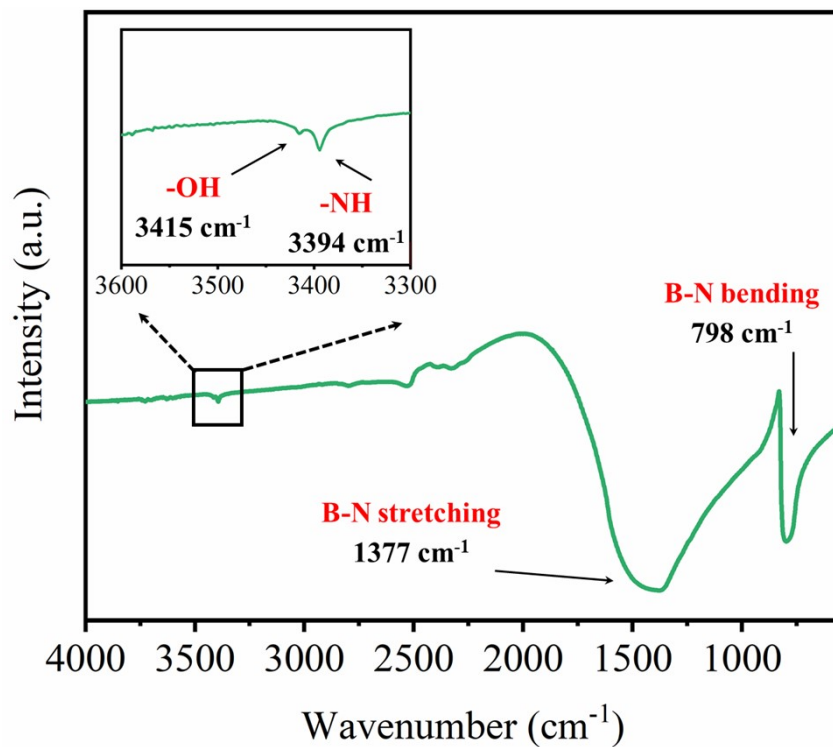

**Fig. S2** FT-IR spectrum of original BN.

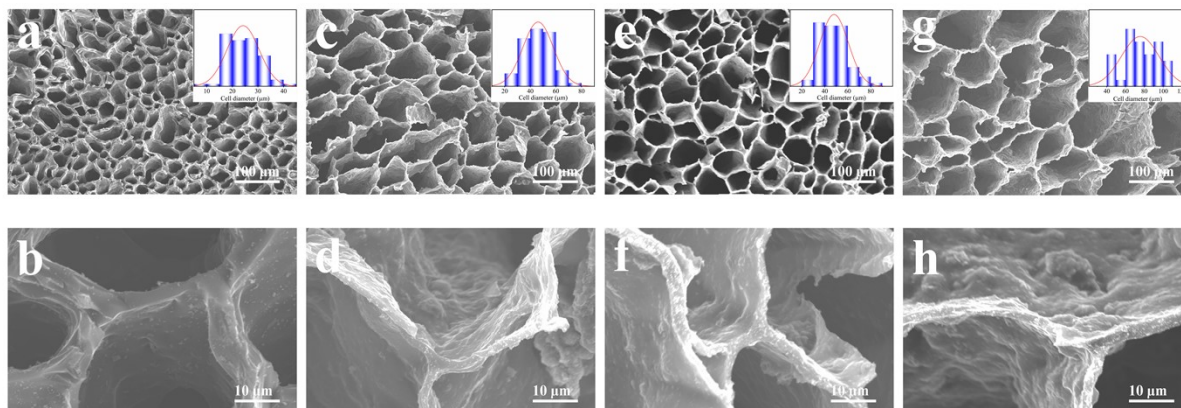

**Fig. S3** SEM images of the cellular structure of (a, b) CCA-680, (c, d) CCA/BN5-680, (e, f) CCA/BN10-680, and (g, h) CCA/BN15-680.

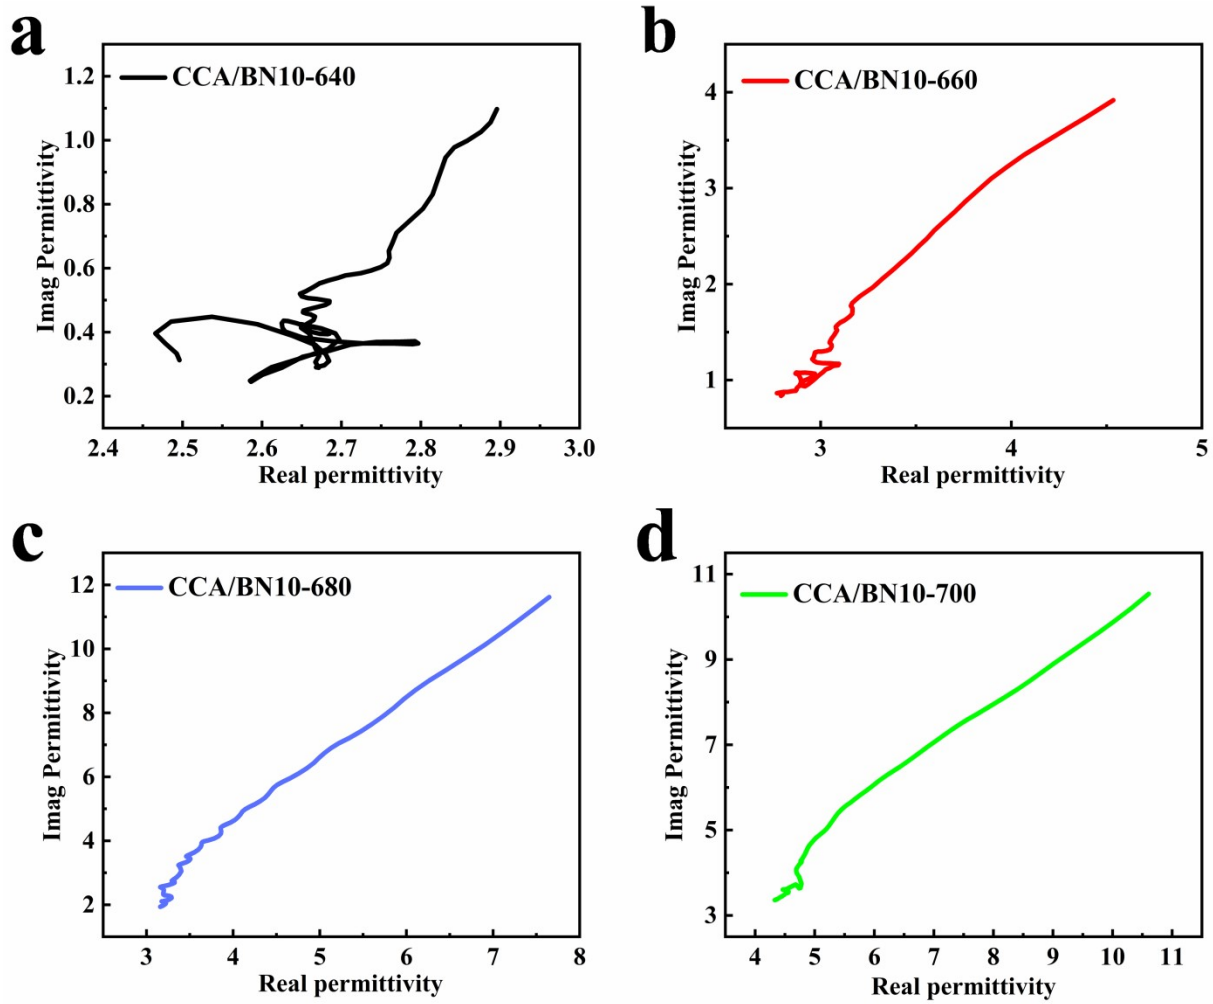

Fig. S4 Cole-Cole curves of CCA/BN10 under different pyrolysis temperature.

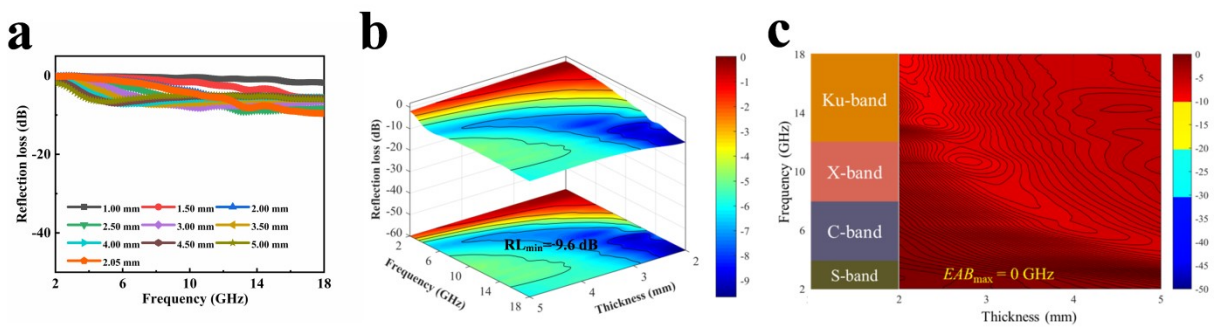

Fig. S5 (a) RL curve, (b) 3D plots and (c) 2D contour of CCA-680.

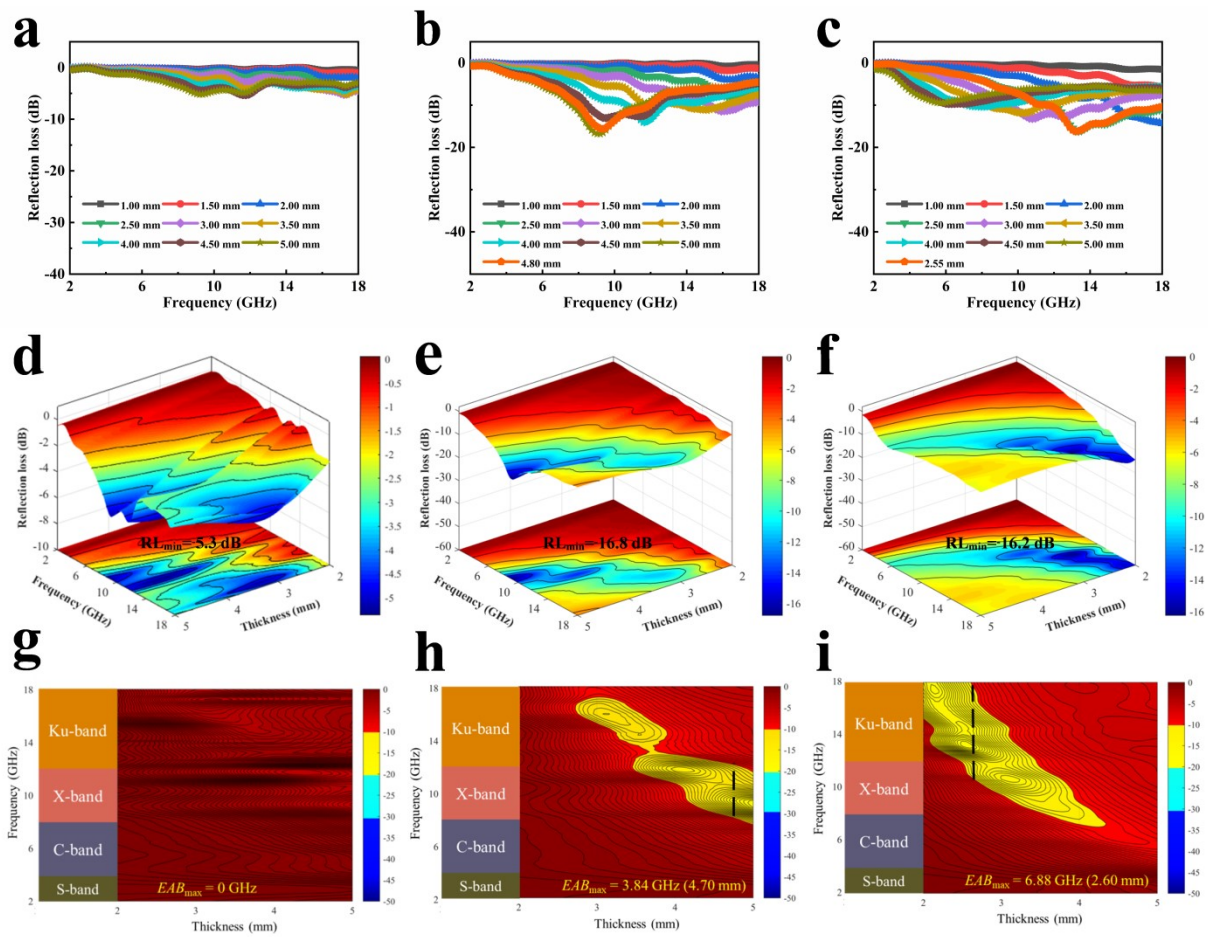

**Fig. S6** RL curves, 3D plots and 2D contour of (a, d, g) CCA/BN10-640, (b, e, h) CCA/BN10-660, and (c, f, i) CCA/BN10-700.
